# Supplementary material
Source: publisher site journal article supplement (https://www.dovepress.com/article/489077)
Supplement: Supplementary file 1 [file get_supplementary_file.php]

**Table S1：RT-PCR primer sequence list**

| Primers | Sequences |
| --- | --- |
| UBE2D1 F | AGCGGATCCAGAAAGTGAGTG |
| UBE2D1 R | TAATTCCTGTGCGGGCCGAT |
| WDR26 F | TAGGACAGCACCTCAATGGC |
| WDR26 R | TTCCCAACAACGTTTGAGAGAT |
| Endosome M-GAPDH F | CCTTCCGTGTTCCTACCCC |
| Endosome M-GAPDH R | GCCCAAGATGCCCTTCAGT |

**Table S2：Inverse MR analysis results**

| gene | id.exposure | id.outcome | outcome | exposure | method | nsnp | b | se | pval | lo_ci | up_ci | or | or_lci95 | or_uci95 |
| --- | --- | --- | --- | --- | --- | --- | --- | --- | --- | --- | --- | --- | --- | --- |
| WDR26 | ieu-b-4980 | eqtl-a-ENSG00000162923 | ENSG00000162923 || id:eqtl-a-ENSG00000162923 | || id:ieu-b-4980 | MR Egger | 5 | -0.063106059 | 0.285961257 | 0.839507007 | -0.623590124 | 0.497378005 | 0.938843895 | 0.536016613 | 1.644403995 |
| WDR26 | ieu-b-4980 | eqtl-a-ENSG00000162923 | ENSG00000162923 || id:eqtl-a-ENSG00000162923 | || id:ieu-b-4980 | Weighted median | 5 | 0.003188382 | 0.125622363 | 0.979751318 | -0.243031451 | 0.249408214 | 1.00319347 | 0.784246848 | 1.283265773 |
| WDR26 | ieu-b-4980 | eqtl-a-ENSG00000162923 | ENSG00000162923 || id:eqtl-a-ENSG00000162923 | || id:ieu-b-4980 | Inverse variance weighted | 5 | 0.011841131 | 0.096089007 | 0.90192429 | -0.176493322 | 0.200175584 | 1.011911515 | 0.838204376 | 1.221617236 |
| WDR26 | ieu-b-4980 | eqtl-a-ENSG00000162923 | ENSG00000162923 || id:eqtl-a-ENSG00000162923 | || id:ieu-b-4980 | Simple mode | 5 | -0.071696182 | 0.165556054 | 0.687298303 | -0.396186047 | 0.252793683 | 0.93081365 | 0.672881496 | 1.287617591 |
| WDR26 | ieu-b-4980 | eqtl-a-ENSG00000162923 | ENSG00000162923 || id:eqtl-a-ENSG00000162923 | || id:ieu-b-4980 | Weighted mode | 5 | -0.028122098 | 0.151617112 | 0.861877357 | -0.325291638 | 0.269047441 | 0.972269647 | 0.722316668 | 1.308717227 |
| UBE2D1 | ieu-b-4980 | eqtl-a-ENSG00000072401 | ENSG00000072401 || id:eqtl-a-ENSG00000072401 | || id:ieu-b-4980 | MR Egger | 5 | -0.041031745 | 0.280466082 | 0.89296352 | -0.590745267 | 0.508681776 | 0.95979866 | 0.553914317 | 1.663097414 |
| UBE2D1 | ieu-b-4980 | eqtl-a-ENSG00000072401 | ENSG00000072401 || id:eqtl-a-ENSG00000072401 | || id:ieu-b-4980 | Weighted median | 5 | -0.056596679 | 0.115042836 | 0.622746361 | -0.282080637 | 0.16888728 | 0.944975121 | 0.754212865 | 1.183986672 |
| UBE2D1 | ieu-b-4980 | eqtl-a-ENSG00000072401 | ENSG00000072401 || id:eqtl-a-ENSG00000072401 | || id:ieu-b-4980 | Inverse variance weighted | 5 | -0.048245269 | 0.096090574 | 0.615610416 | -0.236582793 | 0.140092255 | 0.952900042 | 0.789320529 | 1.150379923 |
| UBE2D1 | ieu-b-4980 | eqtl-a-ENSG00000072401 | ENSG00000072401 || id:eqtl-a-ENSG00000072401 | || id:ieu-b-4980 | Simple mode | 5 | -0.067982929 | 0.137641866 | 0.647261023 | -0.337760985 | 0.201795128 | 0.934276423 | 0.713365772 | 1.223597302 |
| UBE2D1 | ieu-b-4980 | eqtl-a-ENSG00000072401 | ENSG00000072401 || id:eqtl-a-ENSG00000072401 | || id:ieu-b-4980 | Weighted mode | 5 | -0.060075061 | 0.137053783 | 0.683778987 | -0.328700475 | 0.208550353 | 0.941693846 | 0.7198586 | 1.231890957 |

**Table S3：The heterogeneity test**

| gene name | id.exposure | id.outcome | outcome | exposure | method | Q | Q_df | Q_pval |
| --- | --- | --- | --- | --- | --- | --- | --- | --- |
| WDR26 | ieu-b-4980 | eqtl-a-ENSG00000162923 | ENSG00000162923 || id:eqtl-a-ENSG00000162923 | || id:ieu-b-4980 | MR Egger | 3.118702634 | 3 | 0.373683184 |
| WDR26 | ieu-b-4980 | eqtl-a-ENSG00000162923 | ENSG00000162923 || id:eqtl-a-ENSG00000162923 | || id:ieu-b-4980 | Inverse variance weighted | 3.199607408 | 4 | 0.524994359 |
| UBE2D1 | ieu-b-4980 | eqtl-a-ENSG00000072401 | ENSG00000072401 || id:eqtl-a-ENSG00000072401 | || id:ieu-b-4980 | MR Egger | 0.197732899 | 3 | 0.977954453 |
| UBE2D1 | ieu-b-4980 | eqtl-a-ENSG00000072401 | ENSG00000072401 || id:eqtl-a-ENSG00000072401 | || id:ieu-b-4980 | Inverse variance weighted | 0.198482381 | 4 | 0.995389585 |

**Table S4: The horizontal pleiotropy test**

| gene name | id.exposure | id.outcome | outcome | exposure | egger_intercept | se | pval |
| --- | --- | --- | --- | --- | --- | --- | --- |
| WDR26 | ieu-b-4980 | eqtl-a-ENSG00000162923 | ENSG00000162923 || id:eqtl-a-ENSG00000162923 | || id:ieu-b-4980 | 0.006001257 | 0.021512037 | 0.798392032 |
| UBE2D1 | ieu-b-4980 | eqtl-a-ENSG00000072401 | ENSG00000072401 || id:eqtl-a-ENSG00000072401 | || id:ieu-b-4980 | -0.000577615 | 0.02109881 | 0.979878616 |

**Figure S1: Flowchart of the study.**

**
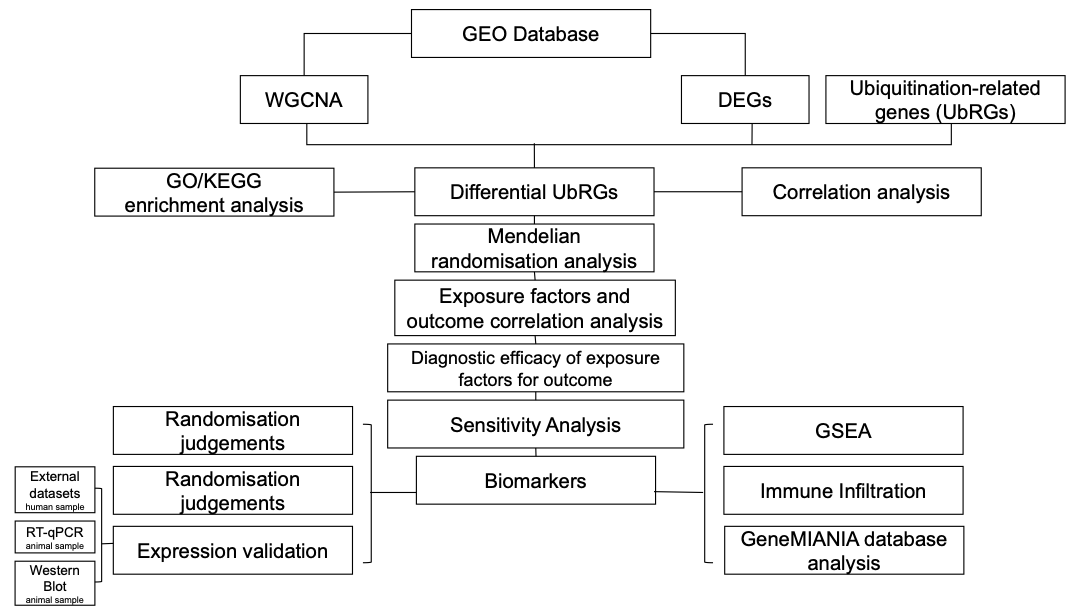
**

**Figure S2 Scatterplot of inverse Mendelian randomisation analysis.**

**
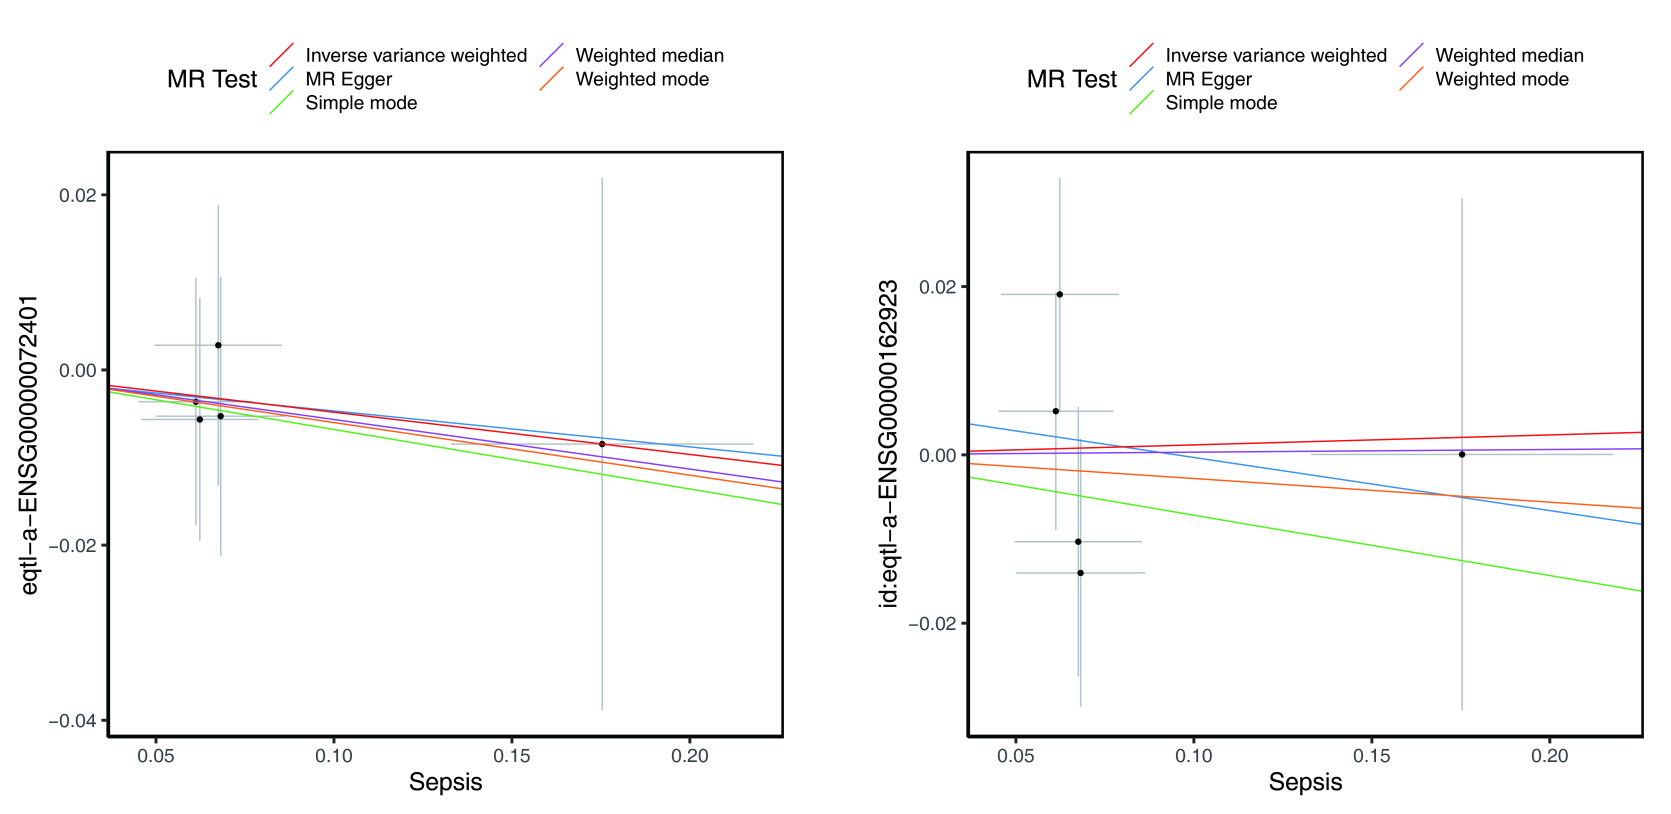
**

Each dot represented an SNP locus, with the horizontal coordinate indicating the effect of SNP on exposure and the vertical coordinate representing the effect of SNP on outcome. The coloured lines demonstrated the results of fitting different algorithms for MR. A positive slope of the line signified a risk factor, while a negative slope indicated a safety factor. When an intercept was present, it implied confounding.

**Figure S3 Forest plot for reverse Mendelian randomisation analysis.**





The solid dots on the left were safety factors and the solid dots on the right were risk factors.

**Figure S4 Mendelian randomisation analysis funnel plot.**

**

**

The samples were symmetrically distributed along both sides of the IVW line, indicating that the MR satisfied Mendel's second law of random grouping.

**Figure S5: Inverse Mendelian randomisation analysis leave-one-out method.**

**

**
